# Supplementary material for: A Wearable Electrochemical Gas Sensor for Ammonia Detection
Source: MDPI journal article supplement (doi:10.3390/s21237905), 2021-11-27
Supplement: s1 [file s1]

# A Wearable Electrochemical Gas Sensor for Ammonia Detection

Martina Serafini<sup>1</sup>, Federica Mariani<sup>1,\*</sup>, Isacco Gualandi<sup>1,\*</sup>, Francesco Decataldo<sup>2</sup>, Luca Possanzini<sup>2</sup>, Marta Tassarolo<sup>2</sup>, Beatrice Fraboni<sup>2</sup>, Domenica Tonelli<sup>1</sup> and Erika Scavetta<sup>1</sup>

<sup>1</sup> Dipartimento di Chimica Industriale “Toso Montanari”, Università di Bologna, Viale del Risorgimento 4, 40136 Bologna, Italy; martina.serafini6@unibo.it (M.S.); domenica.tonelli@unibo.it (D.T.); erika.scavetta2@unibo.it (E.S.)

<sup>2</sup> Dipartimento di Fisica e Astronomia, Università di Bologna, Viale Berti Pichat 6/2, 40127 Bologna, Italy; francesco.decataldo2@unibo.it (F.D.); luca.possanzini2@unibo.it (L.P.); marta.tassarolo3@unibo.it (M.T.); beatrice.fraboni@unibo.it (B.F.)

\* Correspondence: federica.mariani8@unibo.it (F.M.); isacco.gualandi2@unibo.it (I.G.)

## Supplementary Materials:

### Ammonia stripping system assembly and calibration

A pump for air sampling was used to apply a vacuum to the pipes and drive the gas stream throughout the sensing chamber (flow rate of 2 L min<sup>-1</sup>). Humid air and gaseous NH<sub>3</sub> streams were alternated using a three-way valve connected to Drechsel bottles 1 and 2, containing D.I. water and NH<sub>3</sub> aqueous solutions of known concentration, respectively. Active carbon cartridges were employed to avoid contamination from any organic species traces in air. A third Drechsel bottle containing D.I. water was positioned before the pump to re-absorb NH<sub>3</sub> from the gas stream (Figure S1).

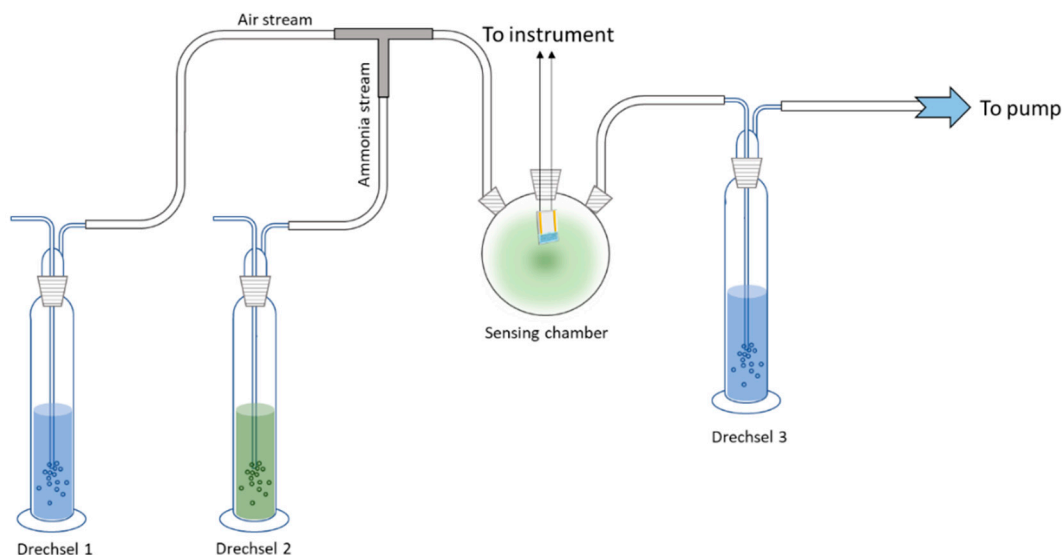

**Figure S1.** Ammonia stripping system.

The system was calibrated by means of a validated analytical method (titration) to establish the exact correlation between [NH<sub>3</sub>]<sub>0</sub> and [NH<sub>3</sub>]<sub>g</sub> delivered to the sensing chamber. For this, a modified version of the Kjeldahl method was chosen [1] that consisted of two steps: (i) complexation of NH<sub>3(g)</sub> with H<sub>3</sub>BO<sub>3</sub> to form (NH<sub>4</sub>)B(OH)<sub>4</sub> and (ii) potentiometric titration with standardized HCl. First, 25 mL of standardised NH<sub>3</sub> aqueous solution (0.01000, 0.04000, or 0.1000 M) was put in a Drechsel bottle, which was in turn connected to a second one containing 25 mL of 0.1 M H<sub>3</sub>BO<sub>3</sub> and attached to the pump (Figure S2).

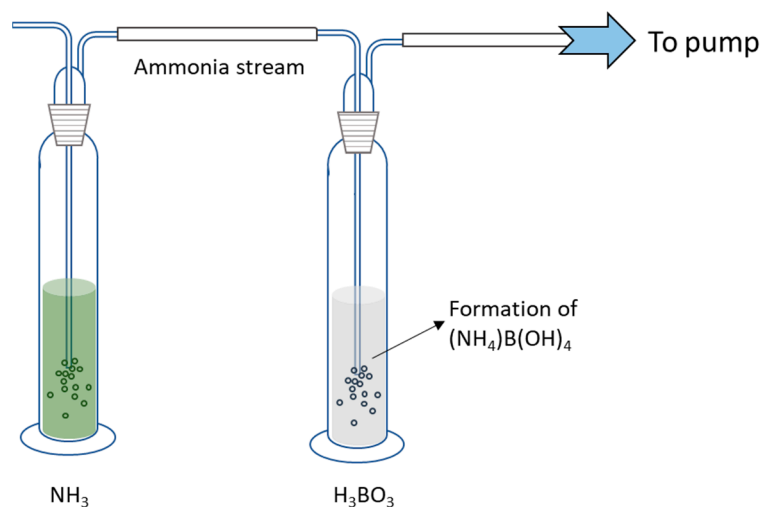

**Figure S2.** Complexation of  $\text{NH}_3(\text{g})$  with  $\text{H}_3\text{BO}_3$  to form  $(\text{NH}_4)\text{B}(\text{OH})_4$ .

$\text{NH}_3$  stripping from the aqueous solution was performed at a flow rate of  $2 \text{ L min}^{-1}$  for 12.5 min, thus ideally delivering 25 L of  $\text{NH}_3(\text{g})$  to the boric acid solution. In diluted solutions of  $\text{H}_3\text{BO}_3$ , ammonia was dissolved as follows:

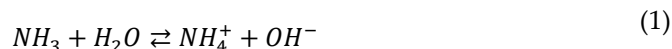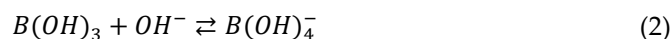

leading to its complexation in the form of ammonium tetrahydroxyborate  $(\text{NH}_4)\text{B}(\text{OH})_4$ .

The solution of  $\text{H}_3\text{BO}_3$  and  $(\text{NH}_4)\text{B}(\text{OH})_4$  was quantitatively transferred into a flask and a potentiometric titration with standardized 0.01000 or 0.1000 M HCl was carried out using a combined glass electrode connected to a pH meter. In order to visually identify the titration endpoint, a few drops of an ethanol solution containing methyl red (0.03% *w/v*) and methylene blue (0.1% *w/v*), known as Tashiro indicator (pH range of color change from green to blue: 6.6–4.4), were added to the sample. Upon addition of HCl, the following reaction takes place until complete consumption of the ammonium complex:

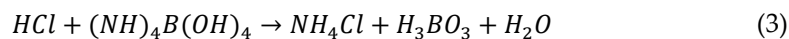

An example of the titration curve is provided in Figure S3.

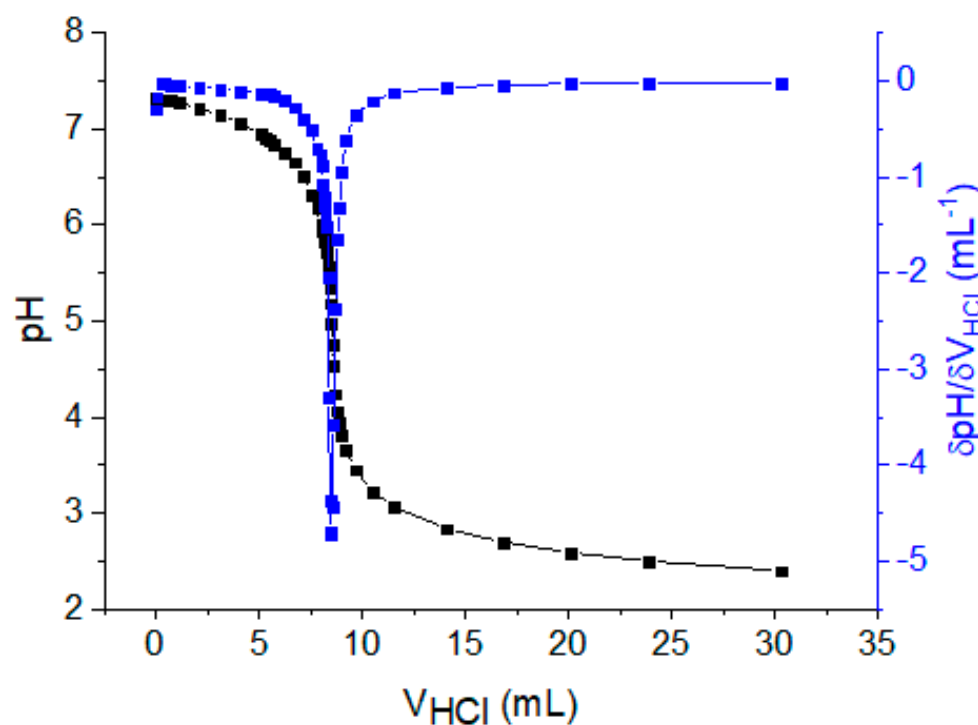

**Figure S3.** Titration curve of  $(\text{NH}_4)\text{B}(\text{OH})_4$  with 0.01000 M HCl following 0.01000 M  $\text{NH}_3$  aqueous solution stripping and bubbling into 25.0 mL of a 0.1 M  $\text{H}_3\text{BO}_3$  solution at a flow rate of 2.00  $\text{L min}^{-1}$  for 12.5 min.

As all the involved reactions have 1:1 stoichiometry, the moles of HCl consumed at the titration endpoint are equivalent to the moles of  $\text{NH}_{3(\text{g})}$  obtained from the stripping process that were initially flushed into the  $\text{H}_3\text{BO}_3$  solution. Consequently, a linear correlation between  $[\text{NH}_3]_{(\text{l})}$  and  $[\text{NH}_3]_{(\text{g})}$  was found, as shown in Figure S4.

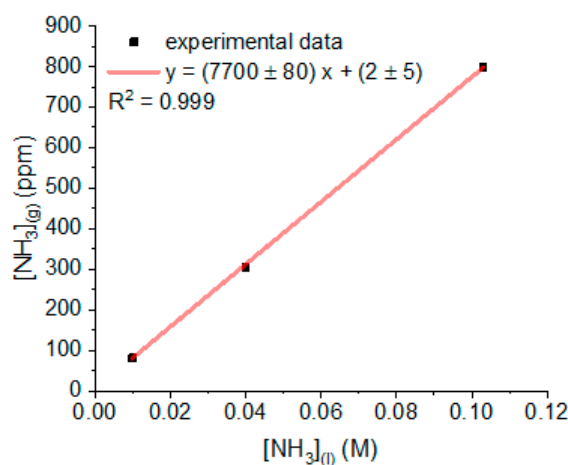

**Figure S4.** Calibration of the stripping system. Correlation between  $[\text{NH}_3]_{(\text{l})}$  and  $[\text{NH}_3]_{(\text{g})}$  obtained after 12.5 min stripping at a flow rate of 2.00  $\text{L min}^{-1}$ .

As the y-intercept value is negligible considering the associated standard error, the equation characteristic of this stripping system can be approximated to  $y = mx$  in accordance with Henry's law. The efficiency of the stripping system was estimated in the range of 45–50%, including eventual head losses.

Finally, integral calculations were conducted in order to determine  $[\text{NH}_3]_{(\text{g})}$  as obtained after 100 s stripping at 2.00  $\text{L min}^{-1}$ , i.e., in the experimental conditions selected

for the measurements with the two-terminal sensor. The results are summarised in Table S1.

**Table S1.** Correlation between  $[\text{NH}_3]_{(l)}$  and  $[\text{NH}_3]_{(g)}$  obtained after 100 s stripping at a flow rate of  $2.00 \text{ L min}^{-1}$ .

| $[\text{NH}_3]_{(l)}$<br>(M) | $[\text{NH}_3]_{(g)}$<br>(ppm) |
|------------------------------|--------------------------------|
| $4.00 \times 10^{-4}$        | 4.00                           |
| $4.00 \times 10^{-3}$        | 40.0                           |
| $4.00 \times 10^{-2}$        | 395                            |
| $4.00 \times 10^{-1}$        | $3.95 \times 10^3$             |
| $8.00 \times 10^{-1}$        | $7.90 \times 10^3$             |
| 1.00                         | $9.87 \times 10^3$             |

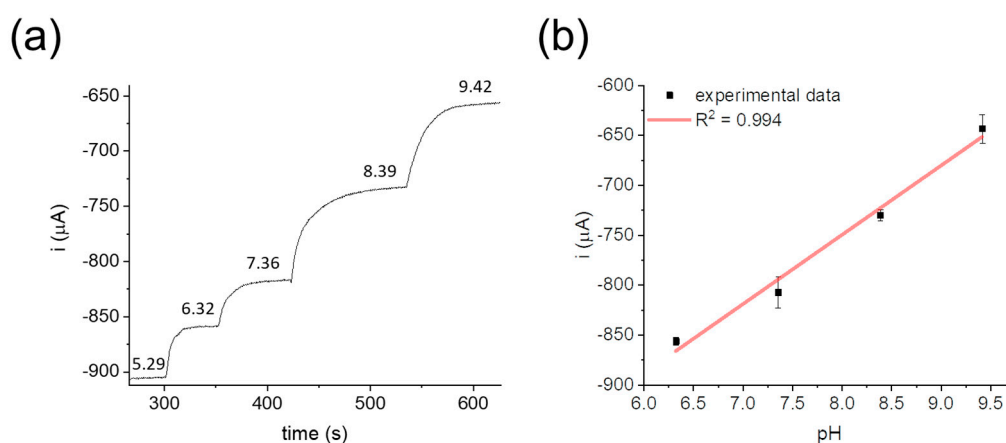

**Figure S5.** PEDOT: PSS/IrOx Ps, two-terminal pH sensor response in solution. (a) Current vs. time response recorded in buffer solution upon addition of 1 M KOH.  $V_{\text{app}} = -200 \text{ mV}$ . (b) Calibration curve obtained from five independent measurements carried out with the same pH sensor.

### Optimization of the hydrogel composition

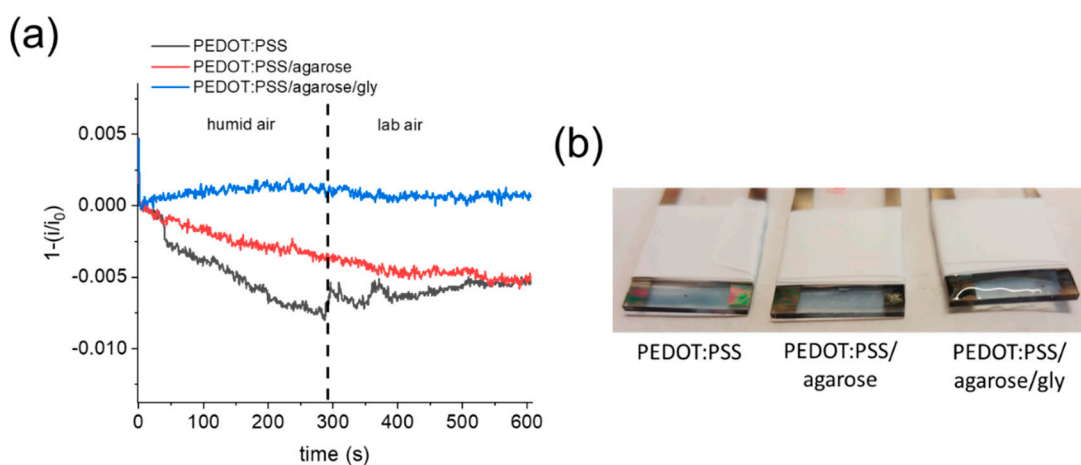

**Figure S6.** Comparison between pristine and glycerol-treated agarose hydrogel on PEDOT: PSS films (bare PEDOT: PSS used as control). (a) Normalised currents recorded from devices placed inside the detection chamber of the stripping system, during alternate exposure to saturated and unsaturated air streams at a flow rate of  $2.00 \text{ L min}^{-1}$ .  $V_{\text{app}} = -200 \text{ mV}$ . (b) Picture of the three films right after the experiment.

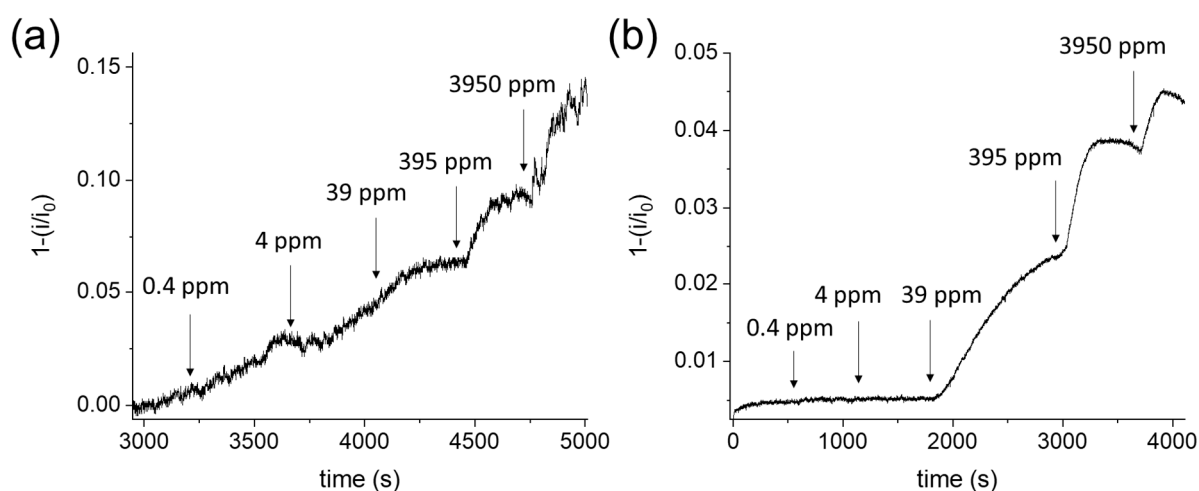

**Figure S7.** Comparison between two-terminal PEDOT: PSS/IrOx Ps sensors modified with (a) 1 mM phosphate buffer (pH 7.00) and (b) 0.1 M KNO<sub>3</sub> containing hydrogels during gaseous NH<sub>3</sub> detection. NH<sub>3</sub>-rich streams of increasing concentration were delivered for 100 s to the detection chamber and alternated to humid air at a flow rate of 2.00 L min<sup>-1</sup>.  $V_{app} = -200$  mV.

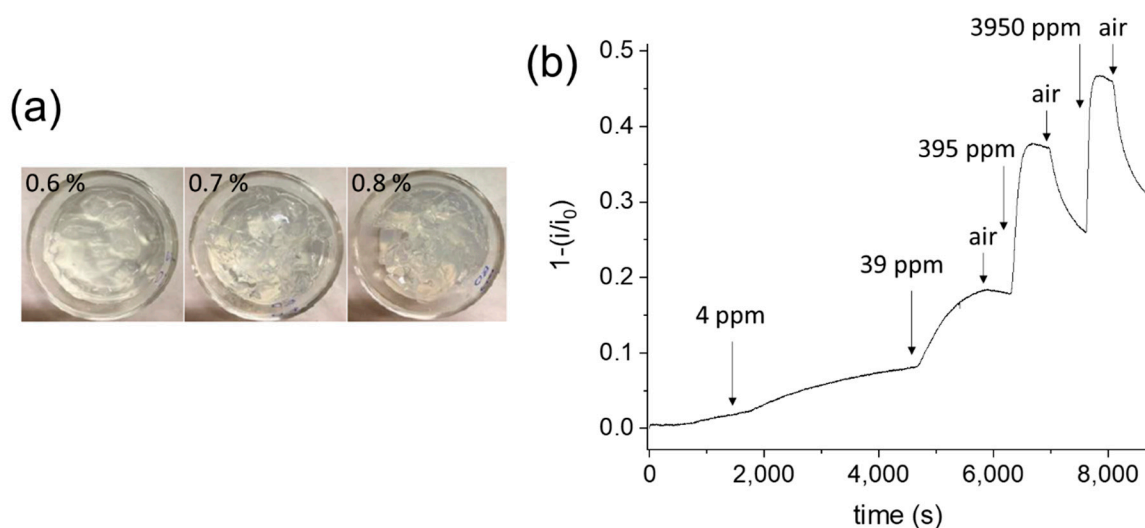

**Figure S8.** Effect of agarose content. (a) From left to right: hydrogels made up with 0.6% (partial gelation), 0.7% (full gelation) and 0.8 % (full gelation) agarose in 0.1 M KNO<sub>3</sub>. (b) Response of a two-terminal PEDOT: PSS/IrOx Ps sensor modified with the 0.7% agarose hydrogel in 0.1 M KNO<sub>3</sub> after gly treatment. NH<sub>3</sub>-rich streams of increasing concentration were delivered for 100 s to the detection chamber and alternated to humid air at a flow rate of 2.00 L min<sup>-1</sup>.  $V_{app} = -200$  mV.

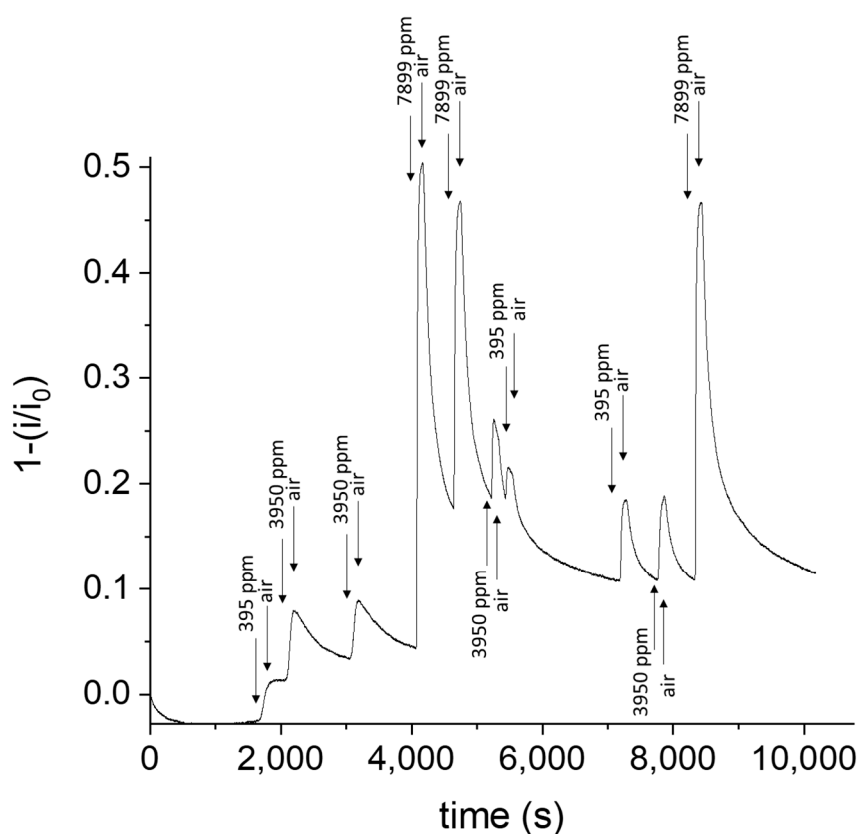

**Figure S9.** Repeated exposure of a PEDOT: PSS/IrOx Ps sensor modified with a glycerol-treated, 0.7% agarose hydrogel in 0.1 M KNO<sub>3</sub> to concentrated NH<sub>3</sub> streams delivered for 100 s to the detection chamber and alternated to humid air at a flow rate of 2.00 L min<sup>-1</sup>. V<sub>app</sub> = −200 mV.

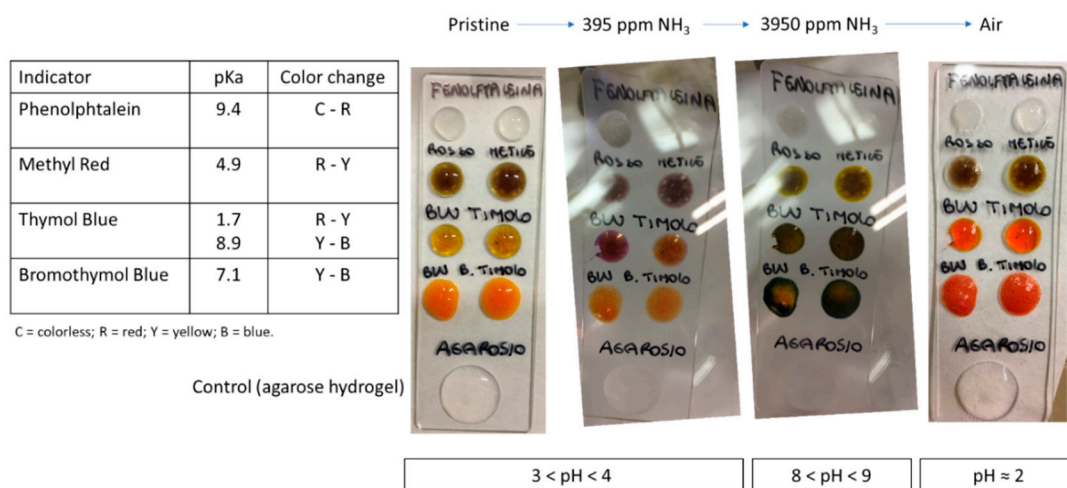

**Figure S10.** Qualitative evaluation of pH variations in a 0.7% agarose in 0.1 M KNO<sub>3</sub> hydrogel by adding a set of pH dyes to the hydrogel composition. Color changes were observed once the glass slide was placed inside the detection chamber and exposed to NH<sub>3</sub> and air streams.

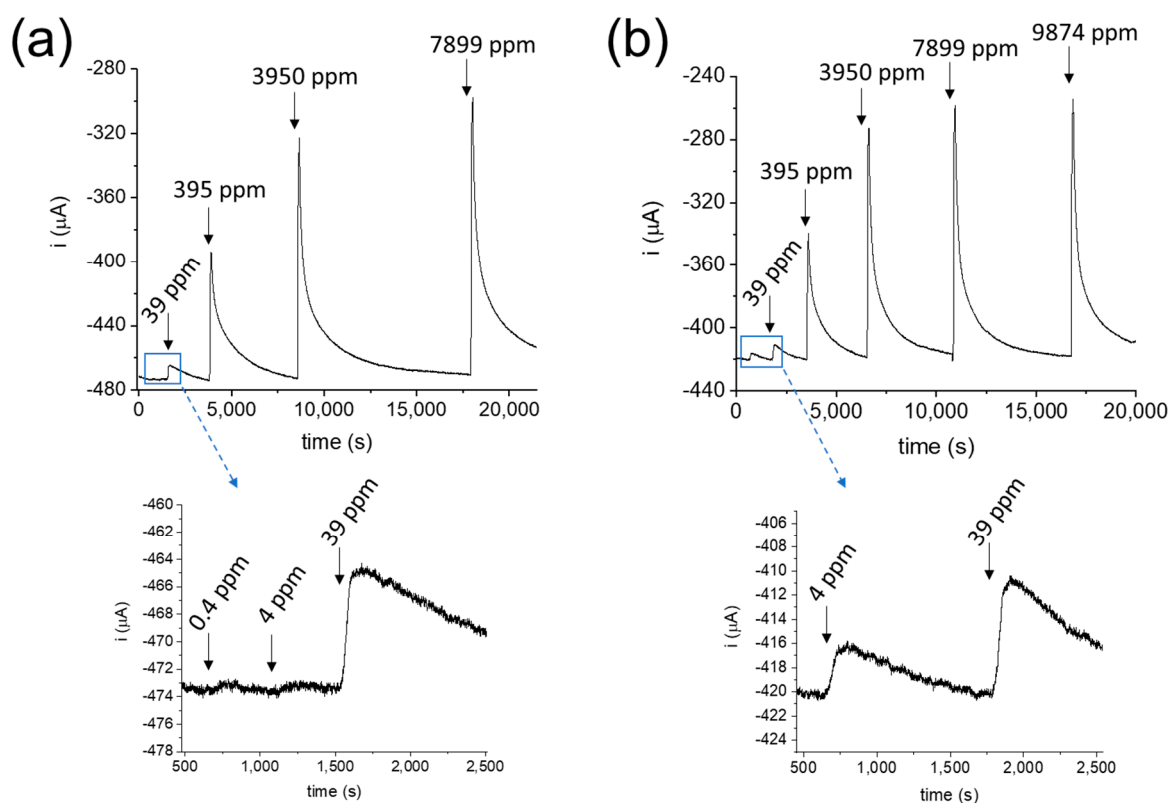

**Figure S11.** Response of two-terminal PEDOT:PSS/IrOx Ps sensors modified with (a) 0.4 and (b) 90 mM  $\text{NH}_3$ -containing hydrogels.  $\text{NH}_3$ -rich streams of increasing concentration were delivered for 100 s to the detection chamber and alternated to humid air at a flow rate of  $2.00 \text{ L min}^{-1}$ .  $V_{\text{app}} = -200 \text{ mV}$ .

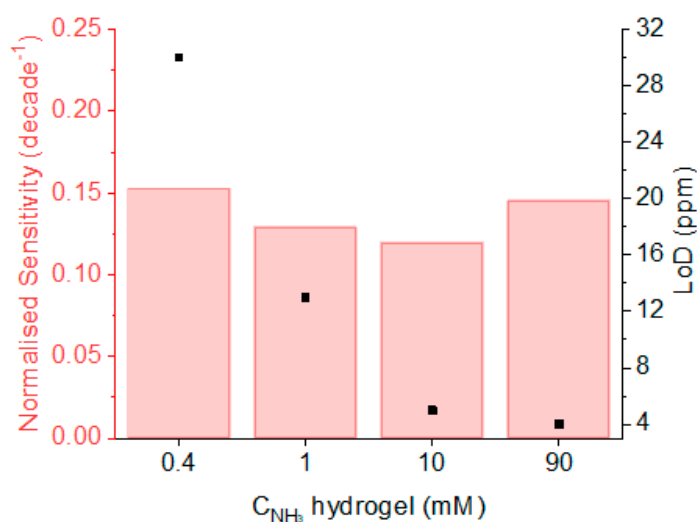

**Figure S12.** Comparison of the analytical performance obtained from two-terminal PEDOT:PSS/IrOx Ps sensors modified with 0.4, 1, 10, or 90 mM  $\text{NH}_3$ -containing hydrogels.

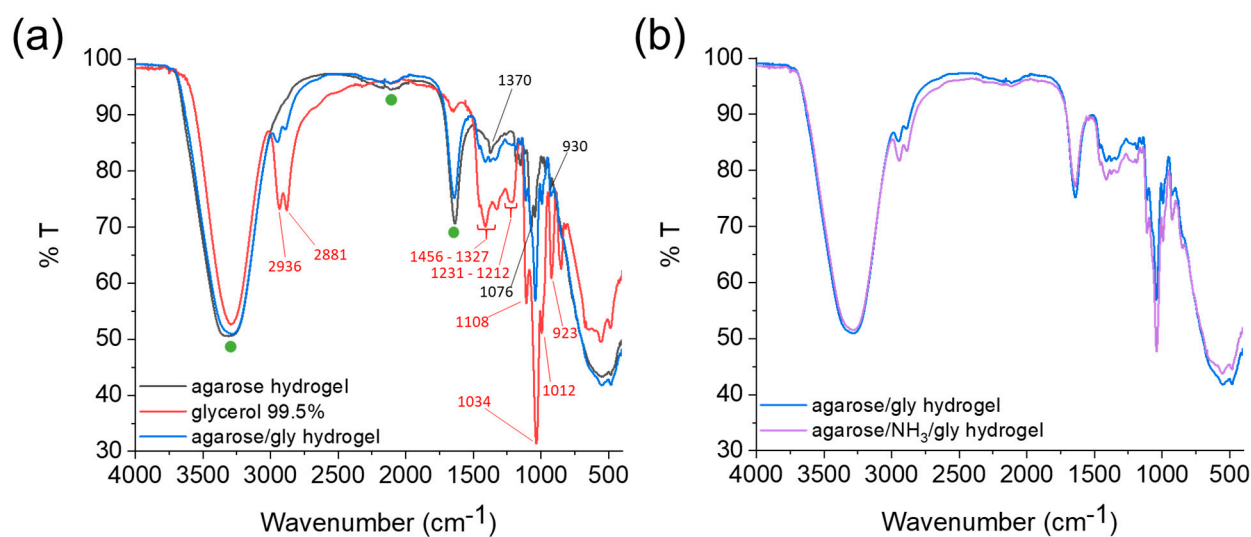

**Figure S13.** IR characterization. (a) Spectra of agarose hydrogel, glycerol, and agarose/gly hydrogel. Characteristic water peaks are highlighted by green circles. (b) Spectra of agarose/gly and the optimized agarose/NH<sub>3</sub>/gly hydrogels.

All the IR spectra are characterised by the strong fingerprint of  $\text{-OH}$  groups, which are due to water presence and to the hydroxyl functional groups in both the agarose and the glycerol. In particular, the peaks at 3500, 1635, and 2120  $\text{cm}^{-1}$  are typical of O-H stretching, O-H-O scissors-bending, and the coupling of the latter with a librational motion of H-bonded  $\text{H}_2\text{O}$  molecules, respectively, and are labelled with green circles in Figure S12a [2]. The characteristic peaks of agarose appear at 1370  $\text{cm}^{-1}$ , which is assigned to ester-sulfate link vibrations, and at 1076 and 930  $\text{cm}^{-1}$ , which are associated with the glycosidic bond vibrations [3,4]. The presence of residual sulfate groups in the agarose structure has been discussed in the literature [5] and is in accordance with the spontaneously acidic pH of the hydrogel. As regards glycerol, the bimodal peak at 2936–2881  $\text{cm}^{-1}$  is assigned to asymmetric vibrations of the  $\text{-CH}_2$  groups, while the C-H bending and deformation vibrations appear at 1456, 1411, and 1327  $\text{cm}^{-1}$ . The peaks at 1231 and 1212  $\text{cm}^{-1}$  are associated to C-O stretching, and the peak at 1108  $\text{cm}^{-1}$  is assigned to C-C stretching, while the peaks at 1034 and 1012  $\text{cm}^{-1}$  are ascribed to C-H deformation and C-C stretching. Bending of the  $\text{-OH}$  group is seen at 923  $\text{cm}^{-1}$  [6]. The spectrum of the agarose/gly hydrogel (blue line) clearly results from the combination of its components (black and red curves). The IR spectrum of the agarose/NH<sub>3</sub>/gly hydrogel optimized in this work is shown in Figure S12b. While all the peaks discussed above that are characteristic of the NH<sub>3</sub>-free hydrogel are still present, the inclusion of NH<sub>3</sub> in the hydrogel structure does not lead to any apparent change. In fact, no additional peaks at 3500–3300  $\text{cm}^{-1}$  (N-H stretching) and 1650–1580  $\text{cm}^{-1}$  (N-H bending) are detected. This could be due to the prominent O-H features masking weaker contributions at those wavelengths.



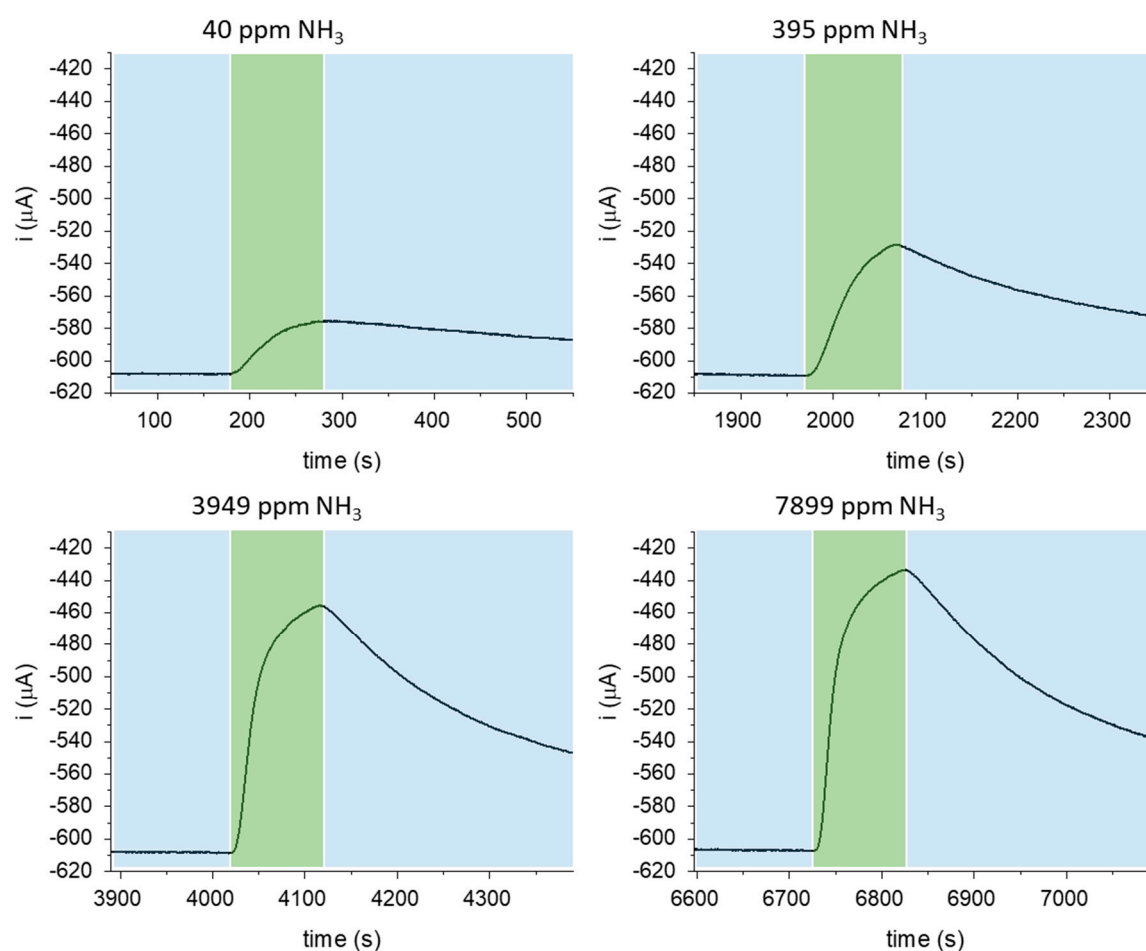

**Figure S14.** Zoom of Figure 4b illustrating the recorded current variations vs. time in response to the different  $\text{NH}_3$ -rich streams delivered for 100 s to the sensing chamber.

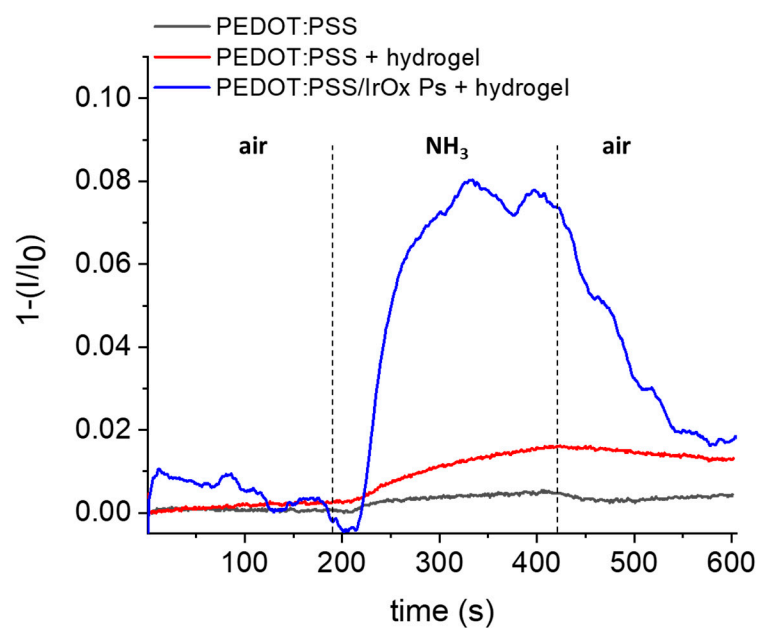

**Figure S15.** Exposure of two-terminal devices, with and without  $\text{IrOx}$  Ps and hydrogel, to a  $\text{NH}_3$ -rich air stream for 100 s at a flow rate of  $2.00 \text{ L min}^{-1}$ .  $V_{\text{app}} = -200 \text{ mV}$ .

## References

1. Cruz, G. Boric Acid in Kjeldahl Analysis. *J. Chem. Educ.* **2013**, *90*, 1645–1648, doi:10.1021/ed4003767.
2. Verma, P.K.; Kundu, A.; Puretz, M.S.; Dhoonmoon, C.; Chegwidan, O.S.; Londergan, C.H.; Cho, M. The Bend+Libration Combination Band Is an Intrinsic, Collective, and Strongly Solute-Dependent Reporter on the Hydrogen Bonding Network of Liquid Water. *J. Phys. Chem. B* **2018**, *122*, 2587–2599, doi:10.1021/acs.jpcc.7b09641.
3. Mollet, J.-C.; Rahaoui, A.; Lemoine, Y. Yield, chemical composition and gel strength of agarocolloids of *Gracilaria gracilis*, *Gracilariopsis longissima* and the newly reported *Gracilaria cf. vermiculophylla* from Roscoff (Brittany, France). *J. Appl. Phycol.* **1998**, *10*, 59, doi:10.1023/A:1008051528443.
4. El-hefian, E.A.; Nasef, M.M.; Yahaya, A.H. Preparation and Characterization of Chitosan/Agar Blended Films: Part 1. Chemical Structure and Morphology. *E-J. Chem.* **2012**, *9*, 781206, doi:10.1155/2012/781206.
5. Armisen, R.; Galatas, F. Production, properties and uses of agar. Production and utilization of products from commercial seaweeds. *FAO Fish. Tech. Pap* **1987**, *288*, 1–57.
6. Kachel-Jakubowska, M.; Matwijczuk, A.; Gagoś, M. Analysis of the physicochemical properties of post-manufacturing waste derived from production of methyl esters from rapeseed oil. *Int. Agrophysics* **2017**, *31*, 175–182, doi:10.1515/intag-2016-0042.
